# Supplementary material for: In Vitro and In Vivo Response of Zinc-Containing Mesoporous Bioactive Glasses in a Sheep Animal Model
Source: MDPI journal article supplement (doi:10.3390/ijms232213918), 2022-11-11
Supplement: s1 [file s1]

# In vitro and in vivo response of zinc-containing mesoporous bioactive glasses in a sheep animal model

## Supporting information

### S.1. Thermogravimetical analysis.

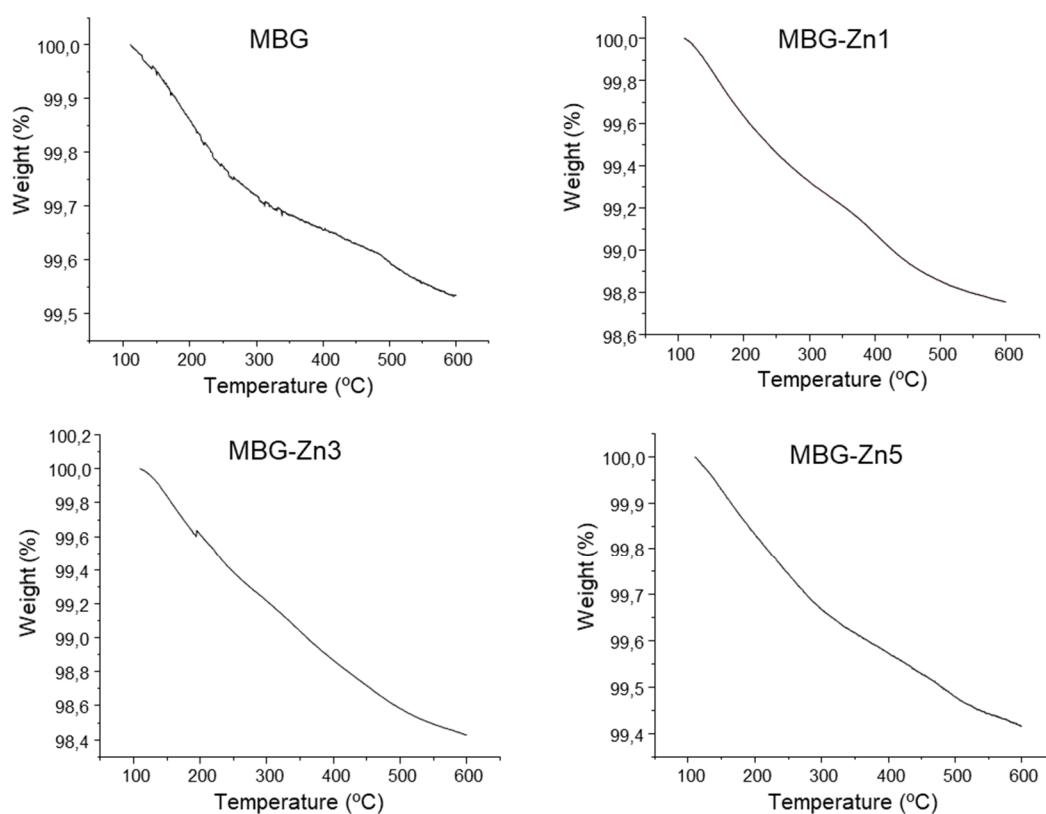

**Figure S1.** Thermogravimetical analysis of the different materials synthesized. The weight losses observed range between 0.4 and 1.5 % and would correspond to the condensation of silanol groups.

## S.2. Implantation procedure

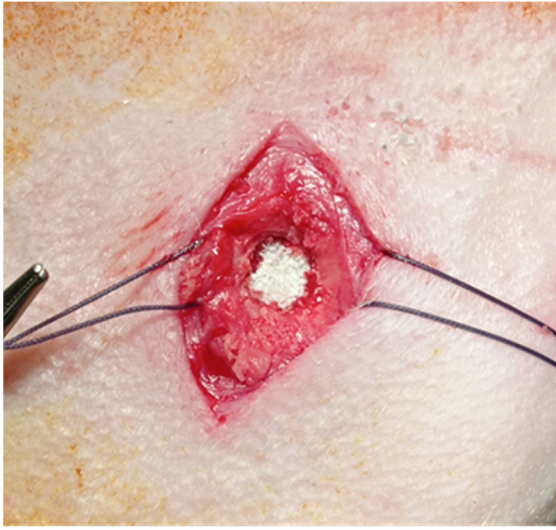

**Figure S2.** Image of the bone defect filled with MBG-Zn5 granules.

## S.3. Computed tomography (CT) images

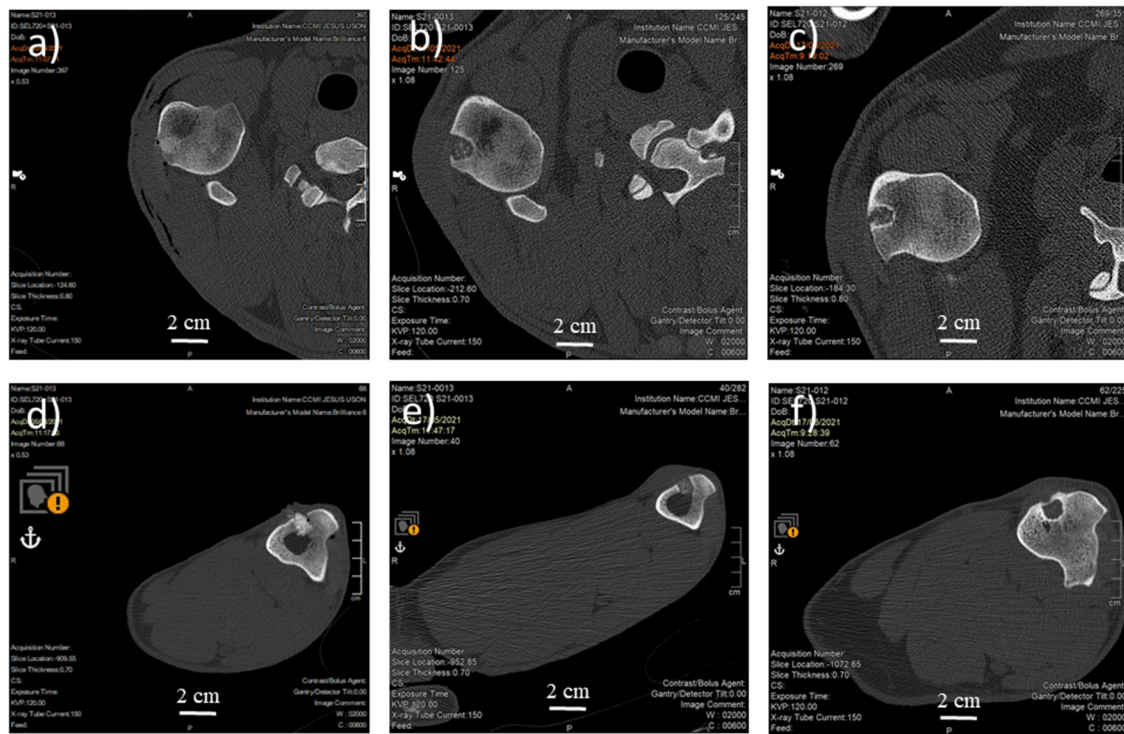

**Figure S3.** CT images for a) MBG post implantation, b) MBG after 6 weeks, c) MBG after 12 weeks, d) MBG-Zn5 post implantation, e) MBG-Zn5 after 6 weeks and f) MBG-Zn5 after 6 weeks.

#### S.4. Cells morphology studies

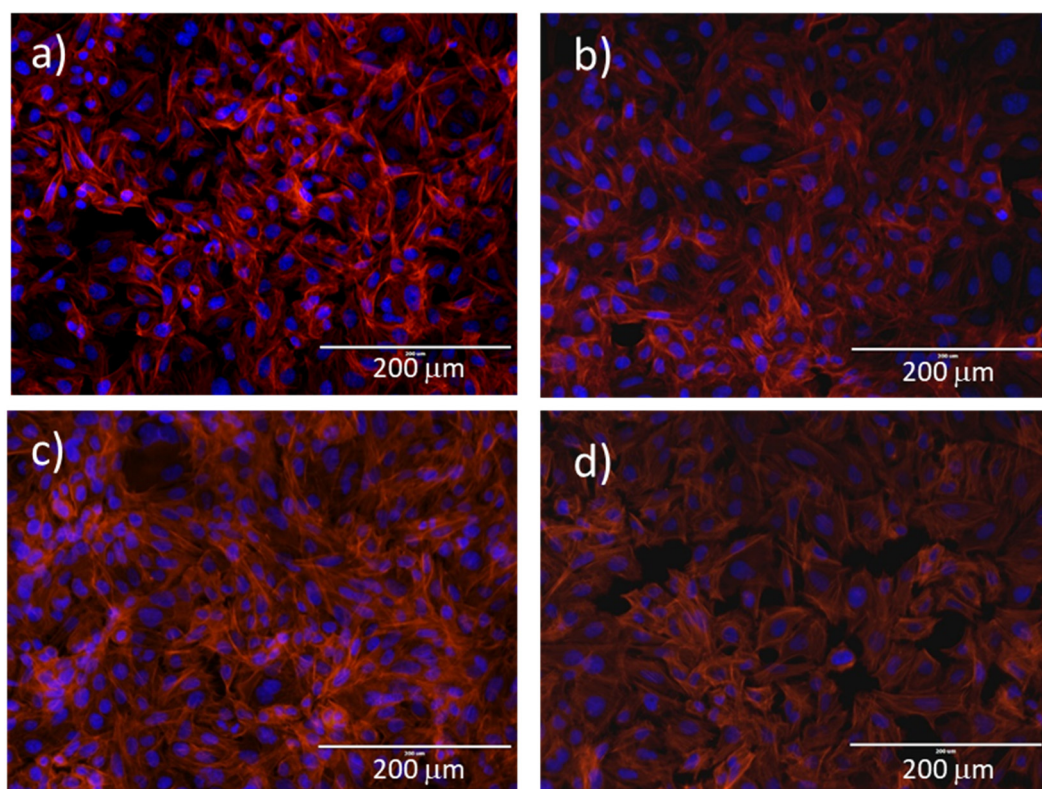

**Figure S4.** Optical images of MB3T3-E1 pre-osteoblast cells obtained after 1 week of culture in the presence of a) MBG; b) MBG-Zn1; c) MBG-Zn3 and d) MBG-Zn5

### S.5. Apatite-forming ability of MBG in $\alpha$ -MEM culture media

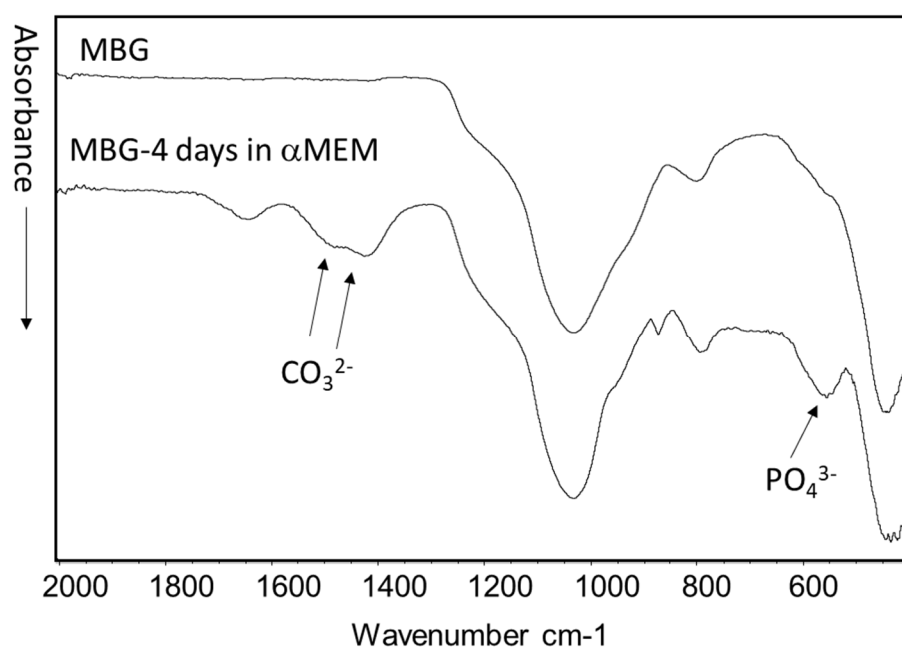

**Figure S5.** FT-IR spectrum of MBG sample before and after being soaked in  $\alpha$ -MEM for 4 days. The presence of absorption bands at 560, 1419 and 1455  $\text{cm}^{-1}$  evidence the formation of a new carbonated calcium phosphate phase similarly to the one observed when soaked in SBF

**Table S1.** Guide for quantitative histological analysis

| Scoring for the extent of inflammatory component                                        |       |
|-----------------------------------------------------------------------------------------|-------|
| Description                                                                             | Score |
| Absent                                                                                  | 0     |
| Mild. Mild or moderate focal infiltrate, or mild multifocal infiltrate                  | 1     |
| Moderate. Marked focal, moderate or marked multifocal, or mild diffuse infiltrate grade | 2     |
| Marked. Marked diffuse infiltrate                                                       | 3     |
| Scoring for the extent of blood vessels formation                                       |       |
| Description                                                                             | Score |
| Absent                                                                                  | 0     |
| Mild: 0-5 vessels /20X microscope field                                                 | 1     |
| Moderate: 5-10 vessels /20X microscope field                                            | 2     |
| Marked >10 vessels / 20X microscope field                                               | 3     |
| Scoring for the extent of osteoblasts presence                                          |       |
| Description                                                                             | Score |
| 0 % of the new formed trabeculae contain osteoblasts                                    | 0     |
| 1-25 % of the new formed trabeculae contain osteoblasts                                 | 1     |
| 26-50 % of the new formed trabeculae contain osteoblasts                                | 2     |
| 51-75% of the pores contain osteoblasts                                                 | 3     |
| 76-100 % of the pores contain osteoblasts                                               | 4     |

| Scoring for the extent of osteoclasts presence         |       |
|--------------------------------------------------------|-------|
| Description                                            | Score |
| Absent                                                 | 0     |
| Mild: 1 – 5 osteoclasts /20X microscope field          | 1     |
| Moderate: 5 - 10 osteoclasts /20X microscope field     | 2     |
| Marked: More than 10 osteoclasts/ 20X microscope field | 3     |
